# Supplementary material for: Soft, miniaturized, wireless olfactory interface for virtual reality
Source: PubMed Central journal article supplement (PMC10169775; doi:10.1038/s41467-023-37678-4), 2023-05-09
Supplement: 41467_2023_37678_MOESM3_ESM.pdf [file 41467_2023_37678_MOESM3_ESM.pdf]

## **Description of Additional Supplementary Information Files Document**

### **Video name: Supplementary Movie 1**

Description: This movie demonstrates the accurate heating temperature control of the OG through the self-developed control panel.

### **Video name: Supplementary Movie 2**

Description: This movie demonstrates the application of the Device 1 in the 4D movie watching.

### **Video name: Supplementary Movie 3**

Description: This movie demonstrates the application of the Device 2 in a VR game.
